# Supplementary material for: Validation of the ALFA-1200 model in older patients with AML treated with intensive chemotherapy
Source: PubMed Central journal article supplement — Blood Adv. 2022 Apr 12;7(5):828–31. doi: 10.1182/bloodadvances.2022007172 (PMC9996355; doi:10.1182/bloodadvances.2022007172), 2022-04-12
Supplement: BLOODA_ADV-2022-007172-mmc1.pdf [file BLOODA_ADV-2022-007172-mmc1.pdf]

**Supplementary Table 1:** Intensive regimen backbone with dose ranges used in the induction treatment of AML patients in this study.

| Regimen                     | Dosing Ranges                                                                                                                                                                                                                                                                                                                                                                                                                                                                                                                                                                                                                                                                                                                                  |
|-----------------------------|------------------------------------------------------------------------------------------------------------------------------------------------------------------------------------------------------------------------------------------------------------------------------------------------------------------------------------------------------------------------------------------------------------------------------------------------------------------------------------------------------------------------------------------------------------------------------------------------------------------------------------------------------------------------------------------------------------------------------------------------|
| 3+7                         | Anthracycline:<br>• Idarubicin 12 mg/m <sup>2</sup> x 3 days<br>OR<br>• Daunorubicin 45-90 mg/m <sup>2</sup> x 3 days<br>PLUS<br>Cytarabine 100-200 mg/m <sup>2</sup> /day continuous infusion x 7 days<br>Cyclophosphamide 500 mg/m <sup>2</sup> every 12 hours x 3 days<br>Cytarabine 2000 mg/m <sup>2</sup> x 5 days<br>Topotecan 1.25 mg/m <sup>2</sup> continuous infusion x 5 days<br>Cladribine 5 mg/m <sup>2</sup> x 5 days                                                                                                                                                                                                                                                                                                            |
| CAT [1]                     | Idarubicin 10 mg/m <sup>2</sup> x 3 days<br>Cytarabine 1000-2000 mg/m <sup>2</sup> x 5 days<br>Daunorubicin 44 mg/m <sup>2</sup> and cytarabine 100 mg/m <sup>2</sup> (liposomal) on Days 1,3,5<br>Fludarabine 30 mg/m <sup>2</sup> x 5 days<br>Cytarabine 2000 mg/m <sup>2</sup> x 5 days<br>Fludarabine 30 mg/m <sup>2</sup> x 5 days<br>Idarubicin 10 mg/m <sup>2</sup> x 3 days<br>Cytarabine 1000 mg/m <sup>2</sup> x 5 days<br>Fludarabine 30 mg/m <sup>2</sup> x 5 days<br>Cytarabine 2000 mg/m <sup>2</sup> x 5 days<br>Filgrastim 5 mcg/kg daily starting the day prior to chemotherapy and continued until count recovery (alternatively a single dose of pegfilgrastim 6 mg can be given the day following chemotherapy completion) |
| CLIA [2]                    | Cytarabine 3000 mg/m <sup>2</sup> every 12 hours on Days 1,3,5 OR on Days 1,2,3                                                                                                                                                                                                                                                                                                                                                                                                                                                                                                                                                                                                                                                                |
| Daunorubicin and cytarabine | Idarubicin 10-12 mg/m <sup>2</sup> x 3 days<br>Cytarabine 1000-2000 mg/m <sup>2</sup> x 5 days                                                                                                                                                                                                                                                                                                                                                                                                                                                                                                                                                                                                                                                 |
| FA [3]                      |                                                                                                                                                                                                                                                                                                                                                                                                                                                                                                                                                                                                                                                                                                                                                |
| FIA [4]                     |                                                                                                                                                                                                                                                                                                                                                                                                                                                                                                                                                                                                                                                                                                                                                |
| FLAG [3]                    |                                                                                                                                                                                                                                                                                                                                                                                                                                                                                                                                                                                                                                                                                                                                                |
| HiDAC [5]                   |                                                                                                                                                                                                                                                                                                                                                                                                                                                                                                                                                                                                                                                                                                                                                |
| IA                          |                                                                                                                                                                                                                                                                                                                                                                                                                                                                                                                                                                                                                                                                                                                                                |

**Supplementary Table 2.** Distribution of covariates among Non-poor and Poor cytogenetic risk groups

| Characteristic                                          | Overall, N = 130      | Non-poor, N = 101     | Poor, N = 29          | p-value <sup>1</sup> |
|---------------------------------------------------------|-----------------------|-----------------------|-----------------------|----------------------|
| Age at diagnosis, Mean+/-SD; (Median)                   | 65.83+/-5.20; (64.15) | 66.00+/-5.48; (64.21) | 65.24+/-4.11; (64.02) | 0.8                  |
| Peripheral blood white cell counts, Mean+/-SD; (Median) | 25.77+/-43.76; (7.55) | 26.81+/-45.37; (8.30) | 22.16+/-38.13; (5.10) | 0.3                  |
| Gender, n/N (%)                                         | 60/130 (46%)          | 46/101 (46%)          | 14/29 (48%)           | 0.8                  |
| Frequency of secondary AML, n/N (%)                     | 30/130 (23%)          | 22/101 (22%)          | 8/29 (28%)            | 0.5                  |

| Characteristic                                  | Overall, N = 130 | Non-poor, N = 101 | Poor, N = 29 | p-value <sup>1</sup> |
|-------------------------------------------------|------------------|-------------------|--------------|----------------------|
| ELN classification of cytogenetic risk, n/N (%) |                  |                   |              | <0.001               |
| Favorable                                       | 37/130 (28%)     | 37/101 (37%)      | 0/29 (0%)    |                      |
| Intermediate                                    | 64/130 (49%)     | 64/101 (63%)      | 0/29 (0%)    |                      |
| Adverse                                         | 29/130 (22%)     | 0/101 (0%)        | 29/29 (100%) |                      |
| CBF, n/N (%)                                    |                  |                   |              | <0.001               |
| t(8;21)(q22;q22.1)                              | 15/130 (12%)     | 15/101 (15%)      | 0/29 (0%)    |                      |
| inv(16)(p13.1q22) or t(16;16)(p13.1;q22)        | 22/130 (17%)     | 22/101 (22%)      | 0/29 (0%)    |                      |
| Frequency of response CR/CRi, n/N (%)           | 95/130 (73%)     | 81/101 (80%)      | 14/29 (48%)  | <0.001               |

<sup>1</sup>Wilcoxon rank sum test; Pearson's Chi-squared test; Fisher's exact test

**Supplementary Table 3.** Distribution of covariates among Go-go, Slow-go, No-go groups

| Characteristic                                          | Overall, N = 130       | Go-go, N = 56          | Slow-go, N = 61        | No-go, N = 13          | p-value <sup>1</sup> |
|---------------------------------------------------------|------------------------|------------------------|------------------------|------------------------|----------------------|
| Age at diagnosis, Mean+/-SD; (Median)                   | 65.83+/- 5.20; (64.15) | 65.86+/- 5.60; (64.02) | 66.07+/- 5.13; (64.44) | 64.61+/- 3.74; (63.41) | 0.7                  |
| Peripheral blood white cell counts, Mean+/-SD; (Median) | 25.77+/- 43.76; (7.55) | 24.62+/- 36.28; (7.80) | 29.49+/- 51.71; (9.00) | 13.25+/- 30.64; (3.70) | 0.11                 |
| Gender, n/N (%)                                         | 60/130 (46%)           | 24/56 (43%)            | 30/61 (49%)            | 6/13 (46%)             | 0.8                  |
| Frequency of secondary AML, n/N (%)                     | 30/130 (23%)           | 14/56 (25%)            | 13/61 (21%)            | 3/13 (23%)             | >0.9                 |
| ELN classification of cytogenetic risk, n/N (%)         |                        |                        |                        |                        | <0.001               |
| Favorable                                               | 37/130 (28%)           | 17/56 (30%)            | 20/61 (33%)            | 0/13 (0%)              |                      |
| Intermediate                                            | 64/130 (49%)           | 39/56 (70%)            | 25/61 (41%)            | 0/13 (0%)              |                      |
| Adverse                                                 | 29/130 (22%)           | 0/56 (0%)              | 16/61 (26%)            | 13/13 (100%)           |                      |

| Characteristic                              | Overall, N =<br>130 | Go-go, N =<br>56 | Slow-go, N =<br>61 | No-go, N =<br>13 | p-<br>value <sup>1</sup> |
|---------------------------------------------|---------------------|------------------|--------------------|------------------|--------------------------|
| CBF, n/N (%)                                |                     |                  |                    |                  | 0.036                    |
| t(8;21)(q22;q22.1)                          | 15/130<br>(12%)     | 7/56 (12%)       | 8/61 (13%)         | 0/13 (0%)        |                          |
| inv(16)(p13.1q22) or<br>t(16;16)(p13.1;q22) | 22/130<br>(17%)     | 10/56 (18%)      | 12/61 (20%)        | 0/13 (0%)        |                          |
| Frequency of response<br>CR/CRi, n/N (%)    | 95/130<br>(73%)     | 46/56 (82%)      | 46/61 (75%)        | 3/13 (23%)       | <0.001                   |

<sup>1</sup>Kruskal-Wallis rank sum test; Pearson's Chi-squared test; Fisher's exact test

#### Reference:

- [1]. Cortes J, Estey E, Beran M, et al. Cyclophosphamide, ara-C and topotecan (CAT) for patients with refractory or relapsed acute leukemia. *Leuk Lymphoma*. 2000;36(5-6):479-484. doi:10.3109/10428190009148395
- [2]. Kadia T, Cortes JE, Jabbour EJ, et al. Phase II Study of Cladribine, Idarubicin, and Cytarabine (araC) in Patients with Acute Myeloid Leukemia (AML). Poster presented at: 57<sup>th</sup> ASH Annual Meeting and Exposition; Dec 2015; Orlando, FL
- [3]. Estey E, Thall P, Andreeff M, et al. Use of granulocyte colony-stimulating factor before, during, and after fludarabine plus cytarabine induction therapy of newly diagnosed acute myelogenous leukemia or myelodysplastic syndromes: comparison with fludarabine plus cytarabine without granulocyte colony-stimulating factor. *J Clin Oncol*. 1994;12(4):671-678. doi:10.1200/JCO.1994.12.4.671
- [4]. Jabbour E, Short NJ, Ravandi F, et al. A randomized phase 2 study of idarubicin and cytarabine with clofarabine or fludarabine in patients with newly diagnosed acute myeloid leukemia. *Cancer*. 2017;123(22):4430-4439. doi:10.1002/cncr.30883
- [5]. Jaramillo S, Benner A, Krauter J, et al. Condensed versus standard schedule of high-dose cytarabine consolidation therapy with pegfilgrastim growth factor support in acute myeloid leukemia. *Blood Cancer J*. 2017;7(5):e564. Published 2017 May 26. doi:10.1038/bcj.2017.45
